# Supplementary material
Source: Springer Nature journal article supplement (https://www.springermedizin.de/resource/supplementary/12943_2013_1219_MOESM7_ESM.pdf/9552420)

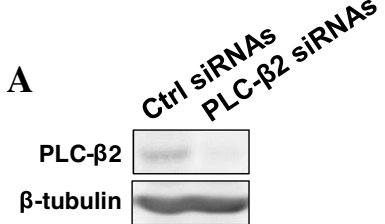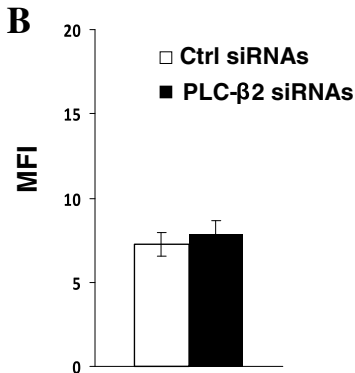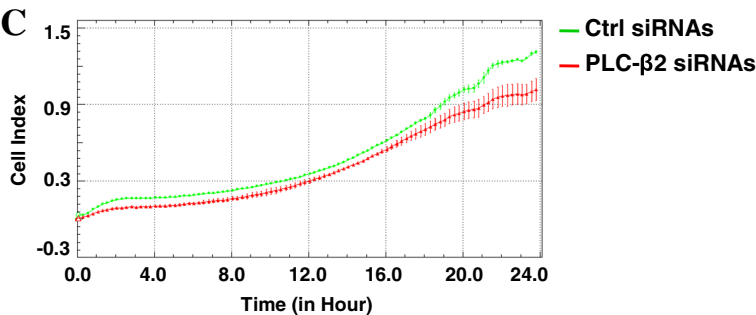

Supplement: MOESM7 [file 9552420]
